# Supplementary material for: ADF/cofilin promotes invadopodial membrane recycling during cell invasion in vivo
Source: PubMed Central journal article supplement — J Cell Biol. 2014 Mar 31;204(7):1209–18. doi: 10.1083/jcb.201312098 (PMC3971745; doi:10.1083/jcb.201312098), 2014-03-31
Supplement: supp_jcb.201312098_JCB_201312098_sm.pdf [file supp_jcb.201312098_JCB_201312098_sm.pdf]

Hagedorn et al., <http://www.jcb.org/cgi/content/full/jcb.201312098/DC1>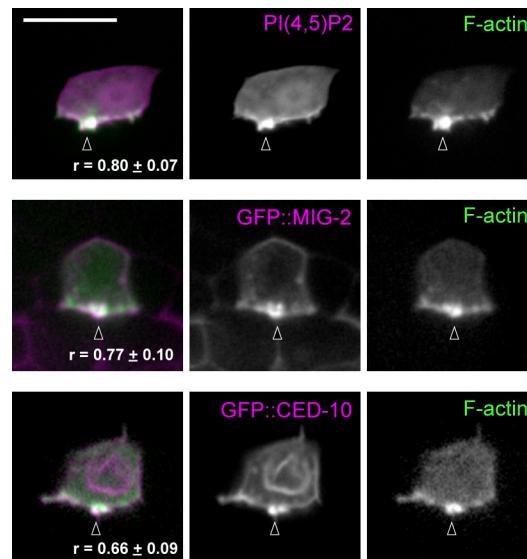

Figure S1. **F-actin and invadopodial membrane components are tightly colocalized in wild-type animals.** Lateral view images show ACs coexpressing the F-actin marker *cdh-3* > mCherry::moeABD (green in overlays, left) with the invadopodial membrane components PI(4,5)P2 (visualized with GFP::PLC $\delta^{PH}$ ), GFP::MIG-2, and GFP::CED-10 (magenta in overlays). F-actin and all invadopodial membrane components localized tightly together within invadopodia at the invasive cell membrane (arrowheads). Pearson's correlation coefficients ( $r$ ) for colocalization are shown as mean  $\pm$  SEM ( $n \geq 5$  animals each genotype).

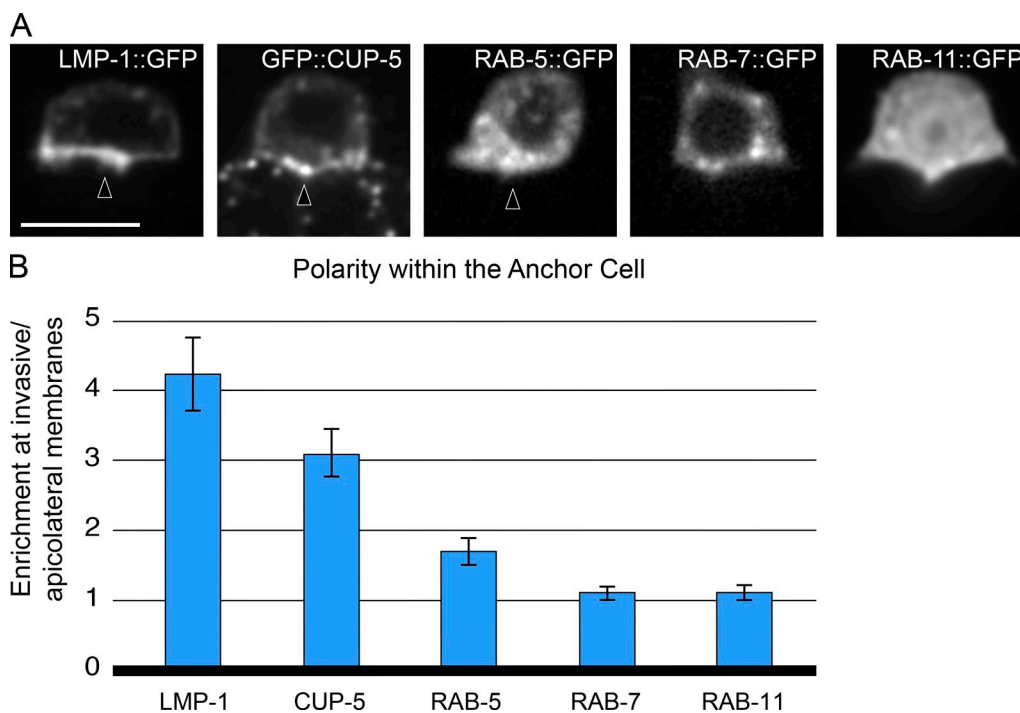

Figure S2. **Polarization of lysosomal but not endosomal proteins during AC invasion.** (A) Early (Rab5; mCherry::RAB-5), late (Rab7; mCherry::RAB-7), and recycling (Rab11; mCherry::RAB-11) endosomal proteins do not enrich at the invasive membrane during AC invasion. However, the lysosomal proteins LMP-1 (mCherry::LMP-1) and CUP-5 (GFP::CUP-5) are highly polarized (three- to fourfold) to the invasive membrane. Lateral-view images; bars, 5  $\mu$ m. (B) Graphs report the fold enrichment of the endosomal and lysosomal markers at the invasive membrane ( $n \geq 5$  animals examined for each genotype, error bars report  $\pm$  SEM).

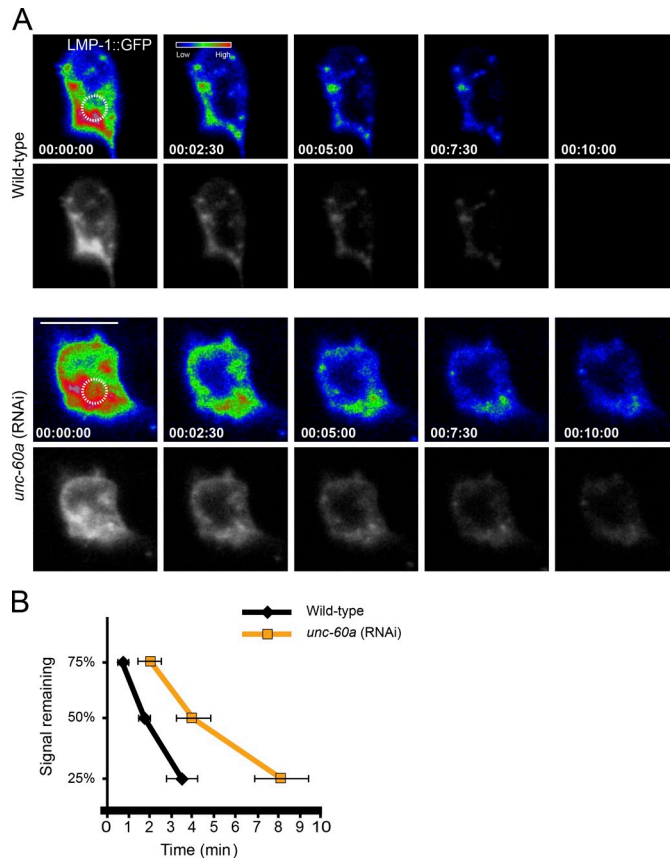

Figure S3. **Invadopodial membrane recycling from the endolysosome is regulated by UNC-60A.** (A) Focused laser photobleaching of an  $\sim 1.0\text{-}\mu\text{m}$  region above the invasive membrane (circle) in a wild-type AC (top row) resulted in over 50% loss of the endolysosome LMP-1::GFP signal throughout the AC within 2.5 min (time-points, minutes). The LMP-1::GFP signal persisted for longer in *unc-60a* (RNAi) animals. The original fluorescent images are shown underneath images depicting a heat map of the fluorescent intensity. (B) Graphs report LMP-1::GFP signal remaining at the nonbleached invasive membrane over time ( $n \geq 5$  animals each genotype;  $P < 0.05$  for 25, 50, and 75% signaling remaining; Student's  $t$  test).

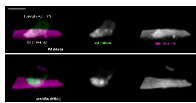

Video 1. **UNC-60A (ADF/cofilin) regulates F-actin dynamics during invadopodia formation.** Lateral-view time-lapses show 3D reconstruction of F-actin in wild-type (top) and *unc-60a* RNAi-treated (bottom) ACs. F-actin is visualized with *cdh-3 > mCherry::moeABD* (green); the basement membrane is visualized with *laminin::GFP* (magenta). Images were acquired using a spinning-disk confocal microscope (CSU-10 scan head; Yokogawa Corporation of America) mounted on an upright microscope (AxioImager; Carl Zeiss). 43-min time-lapses are shown with time-points acquired every 60 s. Projections of seven z-sections (step size of  $1\ \mu\text{m}$ ) are shown. The video plays at 10 frames per second. Bar,  $5\ \mu\text{m}$ . This video corresponds to Fig. 2 C.

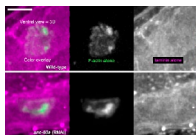

Video 2. **UNC-60A (ADF/cofilin) regulates F-actin dynamics during invadopodia formation.** Ventral-view time-lapses show 3D reconstruction of F-actin in wild-type (top) and *unc-60a* RNAi-treated (bottom) ACs. F-actin is visualized with *cdh-3 > mCherry::moeABD* (green); the basement membrane is visualized with *laminin::GFP* (magenta). Images were acquired using a spinning-disk confocal microscope (CSU-10 scan head; Yokogawa Corporation of America) mounted on an upright microscope (AxioImager; Carl Zeiss). 60-min time-lapses are shown with time-points acquired every 15 s. Projections of eight z-sections (step size of  $0.5\ \mu\text{m}$ ) are shown. The video plays at 10 frames per second. Bar,  $5\ \mu\text{m}$ . This video corresponds to Fig. 2 C.

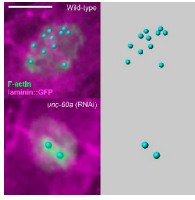

Video 3. **Spot-tracking analysis of AC invadopodia lifetimes.** Ventral-view time-lapses show a wild-type (top) and *unc-60a* RNAi-treated animal (bottom) just before the normal time of basement membrane breaching in wild-type animals. F-actin (*mCherry::moeABD*) is shown in green and laminin (*laminin::GFP*) is shown in magenta; spots (cyan) are overlaid on fluorescence (left) and shown alone (right). Time points were acquired every 15 s and the video plays at a rate of 10 frames per second. Bar, 5  $\mu$ m. This video corresponds to Fig. 2 D.

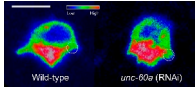

Video 4. **FLIP analysis reveals dynamic recycling of invadopodial membrane through the endolysosomal compartment.** Lateral-view time-lapses show spectral representation of fluorescence intensity of LMP-1::GFP in wild-type (left) and *unc-60a* RNAi-treated (right) ACs. Small 1- $\mu$ m regions of the invasive membrane (circles) were continuously photobleached using 100% laser power and 20 iterations. The first time-point shown is immediately before the start of photobleaching. This analysis was performed using a confocal microscope (LSM 510; Carl Zeiss) equipped with a 100x objective. 10-min time-lapses are shown with time-points acquired every 30 s. The video plays at 10 frames per second. Bar, 5  $\mu$ m. This video corresponds to Fig. 5 A.

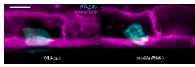

Video 5. **The invadopodial membrane component PI(4,5)P<sub>2</sub> localizes to static intracellular membrane vesicles in the absence of *unc-60a* (ADF/cofilin).** Lateral-view time-lapses show 3D reconstruction of PI(4,5)P<sub>2</sub> in wild-type (left) and *unc-60a* RNAi-treated (right) ACs. PI(4,5)P<sub>2</sub> is visualized with *cdh-3 > mCherry::PLC $\delta$ <sup>PH</sup>* (cyan); the basement membrane is visualized with *laminin::GFP* (magenta). Images were acquired using a spinning-disc confocal microscope (CSU-10 scan head; Yokogawa Corporation of America) mounted on an upright microscope (AxioImager; Carl Zeiss). 40-min time-lapses are shown with time points acquired every 60 s. Projections of seven z-sections (step size of 1  $\mu$ m) are shown. The video plays at 10 frames per second. Bar, 5  $\mu$ m. This video corresponds to Fig. 5 B.

Table S1. **Extrachromosomal array and integrated stain generation**

| Strain designation <sup>a</sup> | PCR fusion created                | Injected concentration | Co-injection marker |
|---------------------------------|-----------------------------------|------------------------|---------------------|
| qyEx237                         | <i>unc-60 &gt; GFP::unc-60a</i>   | 0.1 ng/ $\mu$ l        | unc-119+            |
| qyEx236, qyls224                | <i>cdh-3 &gt; GFP::Cbrunc-60</i>  | 0.1 ng/ $\mu$ l        | unc-119+            |
| qyEx235, qyls222, qyls223       | <i>cdh-3 &gt; GFP::unc-60a</i>    | 0.1 ng/ $\mu$ l        | unc-119+            |
| qyEx282                         | <i>cdh-3 &gt; Dendra2::act-1</i>  | 0.1 ng/ $\mu$ l        | unc-119+            |
| qyEx411                         | <i>zmp-1 &gt; Imp-1::mCherry</i>  | 0.1 ng/ $\mu$ l        | unc-119+            |
| qyEx403                         | <i>cdh-3 &gt; GFP::cup-5</i>      | 0.1 ng/ $\mu$ l        | unc-119+            |
| qyls211                         | <i>cdh-3 &gt; Imp-1::GFP</i>      | 0.1 ng/ $\mu$ l        | unc-119+            |
| qyls205                         | <i>cdh-3 &gt; mCherry::rab-11</i> | 0.1 ng/ $\mu$ l        | unc-119+            |
| qyls252                         | <i>cdh-3 &gt; mCherry::rab-7</i>  | 0.1 ng/ $\mu$ l        | unc-119+            |
| qyls256                         | <i>cdh-3 &gt; mCherry::rab-5</i>  | 0.1 ng/ $\mu$ l        | unc-119+            |

<sup>a</sup>Ex signifies an extrachromosomal transgenic line, whereas *ls* denotes stably integrated lines.

Table S2. Primer sequences and templates used for PCR fusions

| Primer sequence                                            | Primer type                          | Amplicon                 | Template                  |
|------------------------------------------------------------|--------------------------------------|--------------------------|---------------------------|
| 5'-TAATGTGAGTGTAGCTCACTCATTAGG-3'                          | Forward                              | <i>cdh-3</i> > promoter  | pPD107.94/mk62-63         |
| 5'-AACGATGGATACGCTAACCACTTGG-3'                            | Forward, nested                      | <i>cdh-3</i> > promoter  | pPD107.94/mk62-63         |
| 5'-TTTCTGAGCTCGGTACCTCCAAG-3'                              | Reverse                              | <i>cdh-3</i> > promoter  | pPD107.94/mk62-63         |
| 5'-AGTATTGCCAGAAAATCCCGTTGC-3'                             | Forward                              | <i>unc-60</i> > promoter | Fosmid WRM0613bD01        |
| 5'-CTCTTAATGTGAGCCTAGTGCTCG-3'                             | Forward, nested                      | <i>unc-60</i> > promoter | Fosmid WRM0613bD01        |
| 5'-TCACGTGTGAGATCACAGTTGCCG-3'                             | Forward, nested 2                    | <i>unc-60</i> > promoter | Fosmid WRM0613bD01        |
| 5'-GAAAAGTCTTCTCCTTTACTCATACTCTA<br>GAAAACAGGCACACATAG-3'  | <i>gfp</i> extension,<br>reverse     | <i>unc-60</i> > promoter | Fosmid WRM0613bD01        |
| 5'-ATGAGTAAAGGAGAAGAACTTTTC-3'                             | Forward                              | <i>GFP</i>               | pPD95_81                  |
| 5'-TTTGTATAGTTCATCCATGCCATG-3'                             | Reverse                              | <i>GFP</i>               | pPD95_81                  |
| 5'-CATGGCATGGATGAACATACAAATCCGGT<br>GTCATGGTCGACCCAGAT-3'  | <i>gfp</i> extension,<br>forward     | <i>unc-60a</i>           | Fosmid WRM0613bD01        |
| 5'-TCATGGTCGTGGAATTACACGGCC-3'                             | Reverse                              | <i>unc-60a</i>           | Fosmid WRM0613bD01        |
| 5'-TTAGGCTTAGGCTGGGCTTAGCC-3'                              | Reverse, nested                      | <i>unc-60a</i>           | Fosmid WRM0613bD01        |
| 5'-ATAGGCTCAAGCTTAGGCTTAGGC-3'                             | Reverse, nested 2                    | <i>unc-60a</i>           | Fosmid WRM0613bD01        |
| 5'-ATTACACATGGCATGGATGAACAAATGGTGACT<br>GACTAGTTTTTGGCT-3' | <i>gfp</i> extension,<br>forward     | <i>Cbrunc-60</i>         | AF16 genomic DNA          |
| 5'-AGGATCCGAACATGGTCAAAACGG-3'                             | Reverse                              | <i>Cbrunc-60</i>         | AF16 genomic DNA          |
| 5'-AATATGTGGGATTGCTTTAAAACG-3'                             | Reverse, nested                      | <i>Cbrunc-60</i>         | AF16 genomic DNA          |
| 5'-ATGTGTGACGACGAGGTTGC-3'                                 | Forward                              | <i>act-1</i>             | <i>C. elegans</i> genomic |
| 5'-ACTTCCCTTCTGTTCAAAG-3'                                  | Reverse                              | <i>act-1</i>             | <i>C. elegans</i> genomic |
| 5'-CGGAAGTTATCATAACAACCG-3'                                | Reverse, nested                      | <i>act-1</i>             | <i>C. elegans</i> genomic |
| 5'-ATGAACCTTATTAAGGAAGA-3'                                 | Forward                              | <i>Dendra2</i>           | <i>Dendra2</i> plasmid    |
| 5'-CCATGCTTGACTTGGTAGAG-3'                                 | Reverse                              | <i>Dendra2</i>           | <i>Dendra2</i> plasmid    |
| 5'-AAGGGCCCTTCGCCATTTACATCGGCTC-3'                         | Forward                              | <i>cup-5</i>             | pHD736                    |
| 5'-AAGAGCTCGTACGGCCGACTAGTAGG-3'                           | Reverse                              | <i>cup-5</i>             | pHD736                    |
| 5'-AATTAATTAAGACGCTGGCATATCCTTGT-3'                        | Reverse                              | <i>lmp-1</i>             | <i>C. elegans</i> genomic |
| 5'-AAACCGGTATGTTGAAATCGTTTGTATC-3'                         | Forward                              | <i>lmp-1</i>             | <i>C. elegans</i> genomic |
| 5'-AAAAGCGGTTAGCTCCTTCGGTCC-3'                             | Reverse                              | <i>rab-5</i>             | pHD281                    |
| 5'-TCTGTGACTGGTGAGTACTCAACC-3'                             | Reverse, nested                      | <i>rab-5</i>             | pHD281                    |
| 5'-AAAAGCGGTTAGCTCCTTCGGTCC-3'                             | Reverse                              | <i>rab-7</i>             | pHD251                    |
| 5'-TCTGTGACTGGTGAGTACTCAACC-3'                             | Reverse, nested                      | <i>rab-7</i>             | pHD251                    |
| 5'-CTTGGAGGTACCGAGCTCAGAAAATGGTCTCAA<br>GGTGAAGA-3'        | <i>cdh-3</i> , extension,<br>forward | <i>rab-11</i>            | pJWZ529                   |
| 5'-CAGGAAACAGCTATGACCATG-3'                                | Reverse                              | <i>rab-11</i>            | pJWZ529                   |
| 5'-CATTACAGGACAAAGAGAGGG-3'                                | Reverse, nested                      | <i>rab-11</i>            | pJWZ529                   |
